# Supplementary material for: Toxic Metals in Particulate Matter and Health Risks in an E-Waste Dismantling Park and Its Surrounding Areas: Analysis of Three PM Size Groups
Source: MDPI journal article supplement (doi:10.3390/ijerph192215383), 2022-11-21
Supplement: s1 [file ijerph-1968145-supplementary.pdf › ijerph-1968145-supplementary.pdf]

## Supplementary Materials

### **Toxic metals in particulate matter and health risks in an e-waste dismantling park and its surrounding areas: Analysis of three PM size groups**

**Yingjun Wu <sup>1,2</sup>, Guiying Li <sup>1,2,\*</sup> and Taicheng An <sup>1,2</sup>**

<sup>1</sup> Guangdong-Hong Kong-Macao Joint Laboratory for Contaminants Exposure and Health, Guangdong Key Laboratory of Environmental Catalysis and Health Risk Control, Institute of Environmental Health and Pollution Control, Guangdong University of Technology, Guangzhou 510006, China

<sup>2</sup> Guangzhou Key Laboratory of Environmental Catalysis and Pollution Control, Key Laboratory of City Cluster Environmental Safety and Green Development of the Ministry of Education, School of Environmental Science and Engineering, Guangdong University of Technology, Guangzhou 510006, China

\* Correspondence: [ligy1999@gdut.edu.cn](mailto:ligy1999@gdut.edu.cn); Tel.: +86-15323343835

There are 13 pages including 5 figures and 7 tables.

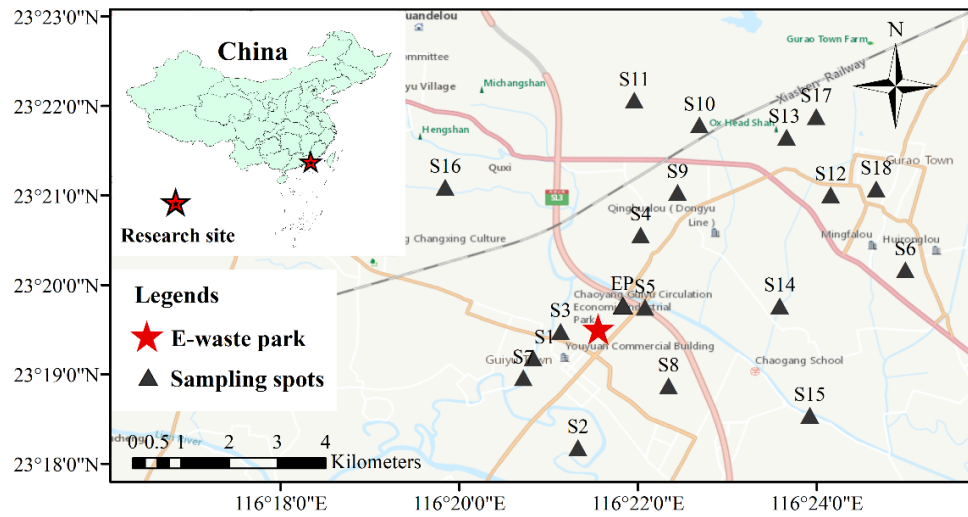

**Figure S1.** Research site and sampling spots in e-waste area

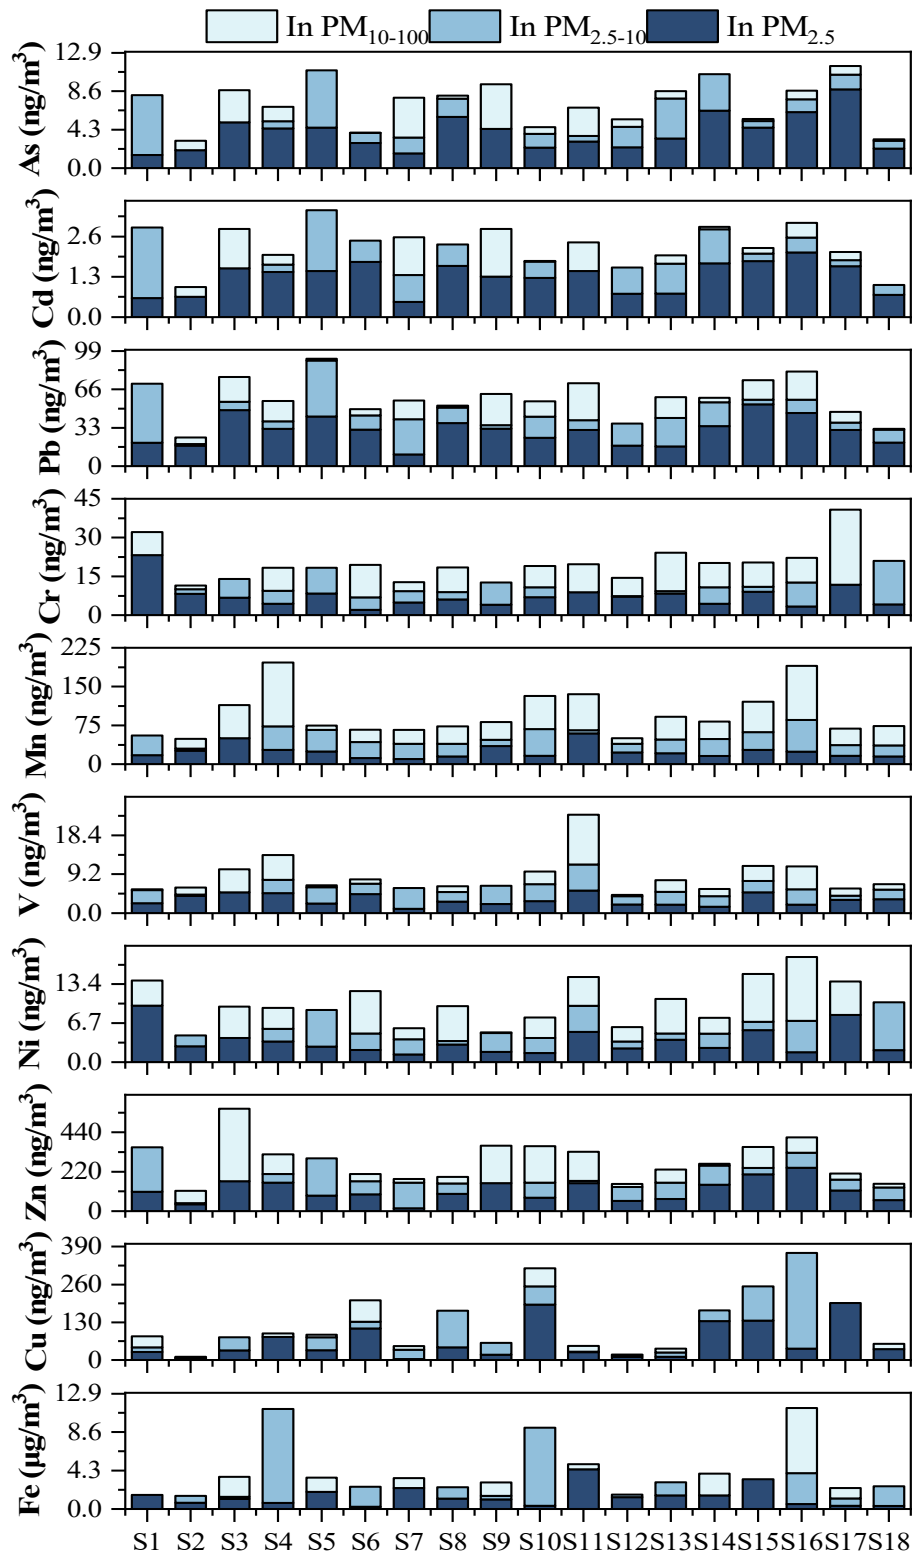

**Figure S2.** Metal concentration in each site of the e-waste surrounding residential area

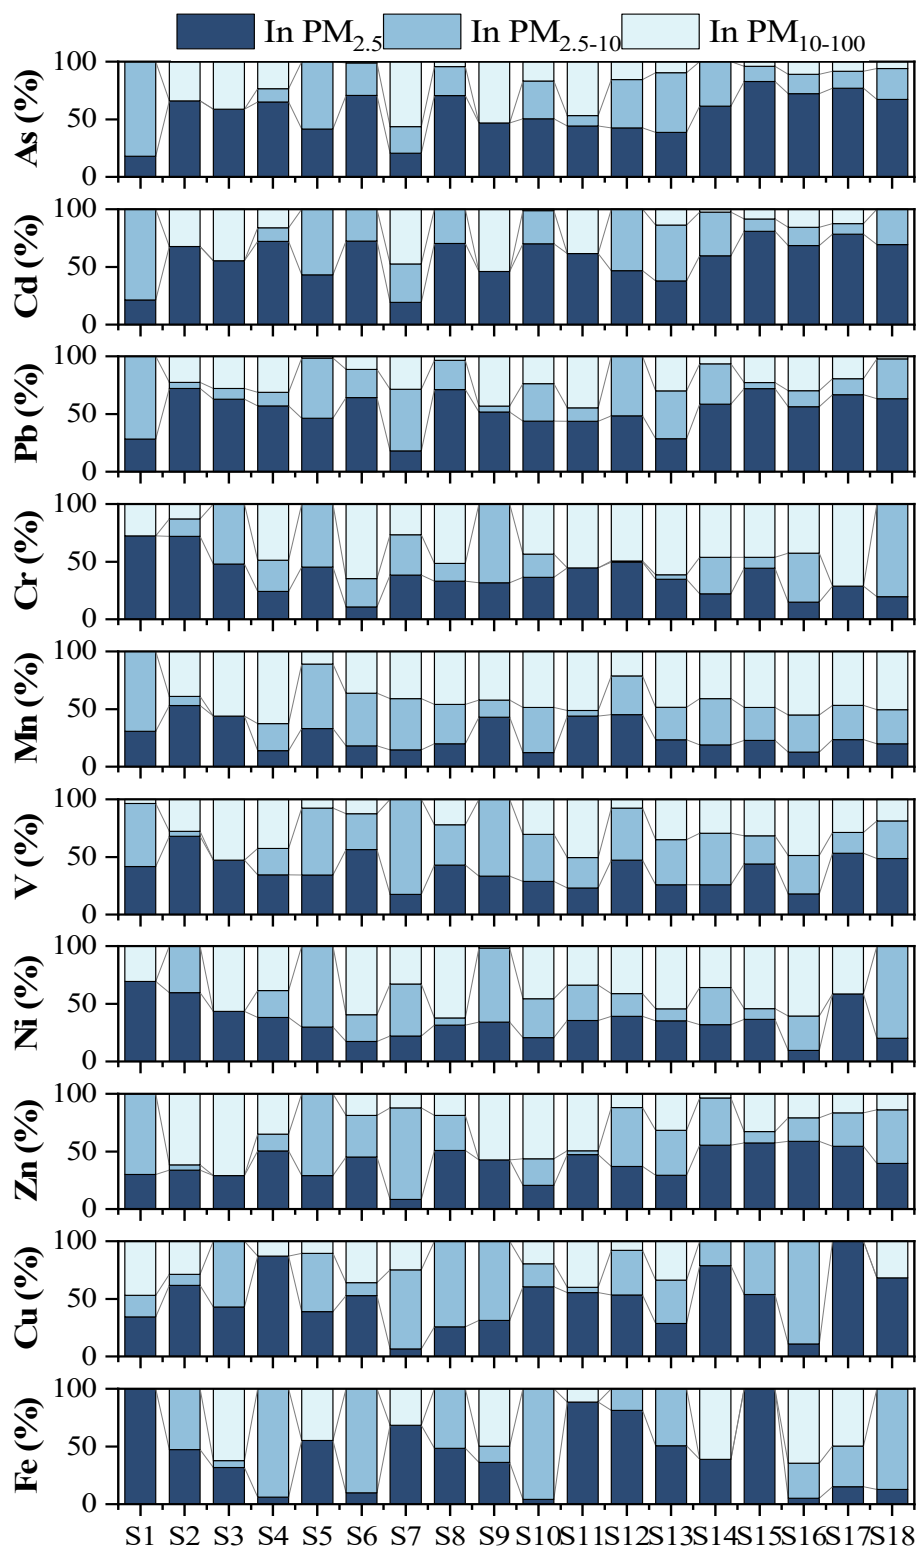

**Figure S3.** Size distribution of metals in each site in the residential areas of e-waste area

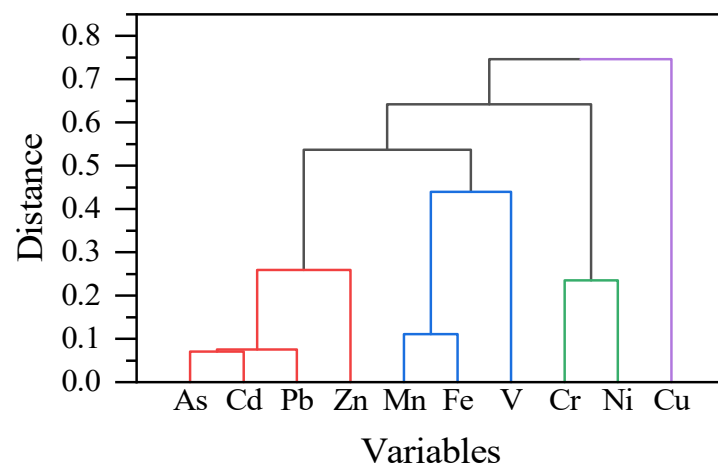

**Figure S4.** The cluster analysis of metals in the surrounding residential area; the same color represents the primary cluster

### In TSP

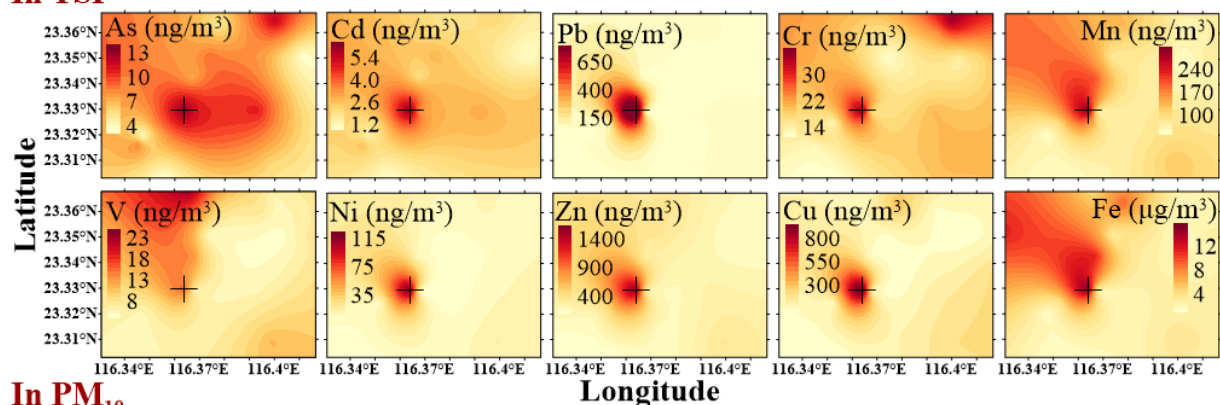

### In PM<sub>10</sub>

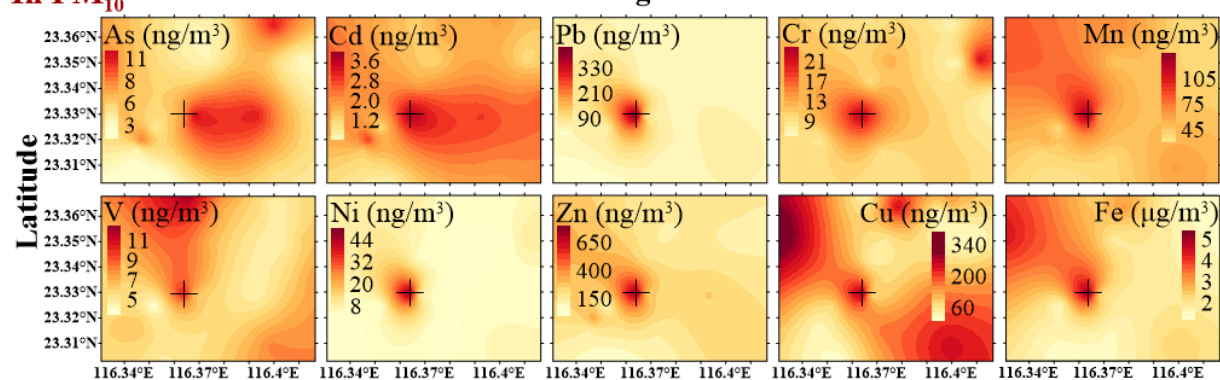

### In PM<sub>2.5</sub>

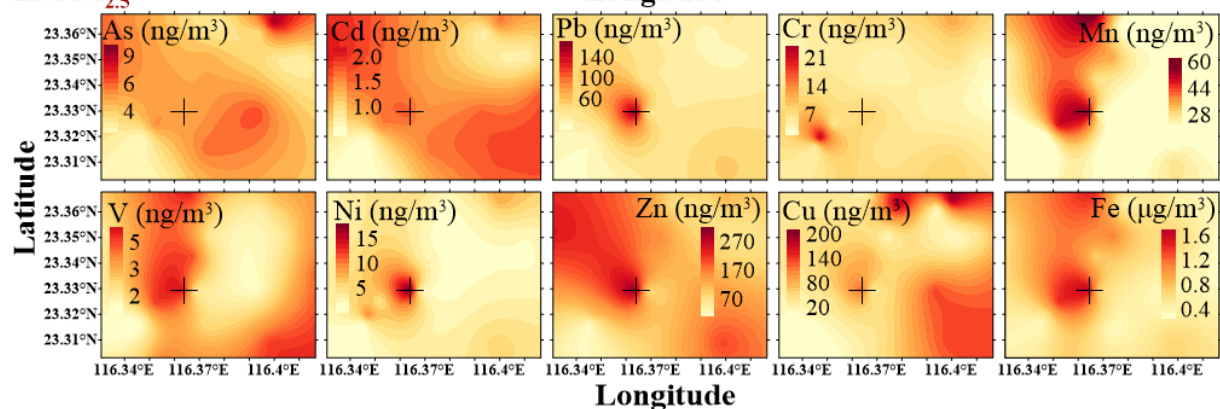

**Figure S5.** Spatial distribution of metal in TSP, PM<sub>10</sub> and PM<sub>2.5</sub> in e-waste dismantling park (the location of cross) and surrounding residential areas; wind direction is mainly northeast.

**Table S1.** The longitude and latitude of sampling spots

| Sampling<br>date | Sampling<br>spot | Longitude<br>(N) | Latitude<br>(E) | Temperature<br>(°C) | Weather                             |
|------------------|------------------|------------------|-----------------|---------------------|-------------------------------------|
| 2017.11.2        | EP               | 116°21'06"       | 23°19'02"       | 34.4                | Sunny                               |
| 2017.11.2        | S1               | 116°22'06"       | 23°19'38"       |                     |                                     |
| 2017.11.3        | S2               | 116°21'36"       | 23°18'02"       | 34.9                | Sunny                               |
| 2017.11.3        | S3               | 116°21'24"       | 23°19'20"       |                     |                                     |
| 2017.11.4        | S4               | 116°22'18"       | 23°20'25"       | 32.5                | Cloudy with<br>scattered light rain |
| 2017.11.4        | S5               | 116°22'22"       | 23°19'27"       |                     |                                     |
| 2017.11.5        | S6               | 116°25'16"       | 23°20'01"       | 32.8                | Sunny                               |
| 2017.11.5        | S7               | 116°20'59"       | 23°18'49"       |                     |                                     |
| 2017.11.6        | S8               | 116°22'37"       | 23°18'44"       | 32.2                | Cloudy                              |
| 2017.11.6        | S9               | 116°22'43"       | 23°20'53"       |                     |                                     |
| 2017.11.7        | S10              | 116°22'58"       | 23°21'39"       | 32.4                | Cloudy to light rain                |
| 2017.11.7        | S11              | 116°22'14"       | 23°21'55"       |                     |                                     |
| 2017.11.8        | S12              | 116°24'26"       | 23°20'52"       | 33.6                | Cloudy to sunny                     |
| 2017.11.8        | S13              | 116°23'56"       | 23°21'30"       |                     |                                     |
| 2017.11.9        | S14              | 116°23'52"       | 23°19'37"       | 32.7                | Sunny                               |
| 2017.11.9        | S15              | 116°24'12"       | 23°18'24"       |                     |                                     |
| 2017.11.10       | S16              | 116°20'07"       | 23°20'57"       | 36.0                | Sunny                               |
| 2017.11.10       | S17              | 116°24'17"       | 23°21'44"       |                     |                                     |
| 2017.11.11       | S18              | 116°24'56"       | 23°20'56"       | 31.0                | Cloudy                              |

**Table S2.** Digestion program of microwave-assisted acid digestion method

| Procedure | Climbing time/min | Duration /min | Temperature /<br>°C | Power/ W |
|-----------|-------------------|---------------|---------------------|----------|
| 1         | 15:00             | 5:00          | 170                 | 1600     |
| 2         | 08:00             | 8:00          | 180                 | 1600     |
| 3         | 08:00             | 15:00         | 200                 | 1600     |
| Total     |                   | 56:00         |                     |          |



**Table S3.** The selected metals IUR and RfC values for health risk assessment

|                                        | As      | Cr       | Ni      | Cd      | V       | Mn      | Pb      |
|----------------------------------------|---------|----------|---------|---------|---------|---------|---------|
| IUR (mg/m <sup>3</sup> )               | 4.3E-03 | 8.40E-02 | 2.6E-04 | 1.8E-03 | -       | -       | 8.0E-05 |
| RfC (ug/m <sup>3</sup> ) <sup>-1</sup> | 1.5E-05 | 1.00E-04 | 9.0E-05 | 1.0E-05 | 1.0E-04 | 5.0E-05 | -       |

Obtained from: <https://www.epa.gov/risk/regional-screening-levels-rsls-generic-tables>

**Table S4.** The Shapiro-Wilk normality test of metals concentration in size fraction in the surrounding residential area in e-waste area

|    |                      | DF | Statistic | p-value  | Decision at level (5%) |
|----|----------------------|----|-----------|----------|------------------------|
| As | PM <sub>2.5</sub>    | 18 | 0.92887   | 0.18553  | Can't reject normality |
|    | PM <sub>2.5-10</sub> | 18 | 0.88691   | 0.03418  | Reject normality       |
|    | PM <sub>10-100</sub> | 18 | 0.87081   | 0.01835  | Reject normality       |
| Cd | PM <sub>2.5</sub>    | 18 | 0.904     | 0.06749  | Can't reject normality |
|    | PM <sub>2.5-10</sub> | 18 | 0.93149   | 0.20624  | Can't reject normality |
|    | PM <sub>10-100</sub> | 18 | 0.88539   | 0.0322   | Reject normality       |
| Pb | PM <sub>2.5</sub>    | 18 | 0.96126   | 0.62614  | Can't reject normality |
|    | PM <sub>2.5-10</sub> | 18 | 0.83408   | 0.0048   | Reject normality       |
|    | PM <sub>10-100</sub> | 18 | 0.92663   | 0.16939  | Can't reject normality |
| Cr | PM <sub>2.5</sub>    | 18 | 0.75589   | 3.86E-04 | Reject normality       |
|    | PM <sub>2.5-10</sub> | 18 | 0.92648   | 0.16831  | Can't reject normality |
|    | PM <sub>10-100</sub> | 18 | 0.88222   | 0.02846  | Reject normality       |
| Mn | PM <sub>2.5</sub>    | 18 | 0.82779   | 0.00386  | Reject normality       |
|    | PM <sub>2.5-10</sub> | 18 | 0.99212   | 0.99978  | Can't reject normality |
|    | PM <sub>10-100</sub> | 18 | 0.92946   | 0.18997  | Can't reject normality |
| V  | PM <sub>2.5</sub>    | 18 | 0.92499   | 0.15845  | Can't reject normality |
|    | PM <sub>2.5-10</sub> | 18 | 0.9534    | 0.48079  | Can't reject normality |
|    | PM <sub>10-100</sub> | 18 | 0.84913   | 0.00821  | Reject normality       |
| Ni | PM <sub>2.5</sub>    | 18 | 0.81595   | 0.00257  | Reject normality       |
|    | PM <sub>2.5-10</sub> | 18 | 0.94031   | 0.2934   | Can't reject normality |
|    | PM <sub>10-100</sub> | 18 | 0.97651   | 0.90711  | Can't reject normality |
| Zn | PM <sub>2.5</sub>    | 18 | 0.97013   | 0.80014  | Can't reject normality |
|    | PM <sub>2.5-10</sub> | 18 | 0.94091   | 0.30035  | Can't reject normality |
|    | PM <sub>10-100</sub> | 18 | 0.89624   | 0.04944  | Reject normality       |
| Cu | PM <sub>2.5</sub>    | 18 | 0.81561   | 0.00255  | Reject normality       |
|    | PM <sub>2.5-10</sub> | 18 | 0.76532   | 5.12E-04 | Reject normality       |
|    | PM <sub>10-100</sub> | 18 | 0.76956   | 5.82E-04 | Reject normality       |
| Fe | PM <sub>2.5</sub>    | 18 | 0.83224   | 0.0045   | Reject normality       |
|    | PM <sub>2.5-10</sub> | 18 | 0.88584   | 0.03277  | Reject normality       |
|    | PM <sub>10-100</sub> | 18 | 0.71373   | 1.16E-04 | Reject normality       |

**Table S5.** The recovery of metals in the blank quartz fiber filters with spiked 50 µg/L metals

| Element | 1#    | 2#    | 3#    | Average        | Standard  | Average recovery |
|---------|-------|-------|-------|----------------|-----------|------------------|
|         |       |       |       | concentrations | deviation |                  |
| Unit    |       |       |       | µg/L           |           | %                |
| V       | 45.22 | 43.10 | 42.39 | 43.57          | 1.47      | 87.14            |
| Cr      | 44.32 | 42.34 | 39.38 | 42.01          | 2.49      | 84.02            |
| Mn      | 42.93 | 42.12 | 38.67 | 41.24          | 2.26      | 82.47            |
| Ni      | 45.99 | 43.21 | 41.90 | 43.70          | 2.09      | 87.39            |
| Cu      | 45.35 | 42.54 | 41.47 | 43.12          | 2.00      | 86.24            |
| Zn      | 42.42 | 44.77 | 35.17 | 40.78          | 5.00      | 81.57            |
| As      | 47.03 | 46.25 | 46.10 | 46.46          | 0.50      | 92.91            |
| Cd      | 48.73 | 47.67 | 47.66 | 48.02          | 0.61      | 96.04            |
| Pb      | 46.15 | 45.17 | 45.17 | 45.49          | 0.57      | 90.99            |

**Table S6.** The Spearman correlation of metals in e-waste dismantling park

|    | As      | Cd      | Pb      | Cr     | Mn      | V     | Ni      | Zn      | Cu      |
|----|---------|---------|---------|--------|---------|-------|---------|---------|---------|
| Cd | 0.500   |         |         |        |         |       |         |         |         |
| Pb | 0.500   | 1.000** |         |        |         |       |         |         |         |
| Cr | -0.500  | 0.500   | 0.500   |        |         |       |         |         |         |
| Mn | 0.500   | 1.000** | 1.000** | 0.500  |         |       |         |         |         |
| V  | 1.000** | 0.500   | 0.500   | -0.500 | 0.500   |       |         |         |         |
| Ni | 0.500   | 1.000** | 1.000** | 0.500  | 1.000** | 0.500 |         |         |         |
| Zn | 0.500   | 1.000** | 1.000** | 0.500  | 1.000** | 0.500 | 1.000** |         |         |
| Cu | 0.500   | 1.000** | 1.000** | 0.500  | 1.000** | 0.500 | 1.000** | 1.000** |         |
| Fe | 0.500   | 1.000** | 1.000** | 0.500  | 1.000** | 0.500 | 1.000** | 1.000** | 1.000** |

\*\* : The correlation is significant at the 0.01 level (two-tailed);

**Table S7.** The Spearman correlation coefficients of metals in the residential area surrounding the e-waste dismantling park

|    | As      | Cd      | Pb      | Cr      | Mn      | V       | Ni    | Zn     | Cu     |
|----|---------|---------|---------|---------|---------|---------|-------|--------|--------|
| Cd | 0.917** |         |         |         |         |         |       |        |        |
| Pb | 0.674** | 0.668** |         |         |         |         |       |        |        |
| Cr | -0.184  | -0.164  | -0.046  |         |         |         |       |        |        |
| Mn | -0.181  | -0.286* | 0.211   | 0.256   |         |         |       |        |        |
| V  | 0.048   | 0.057   | 0.392** | 0.054   | 0.416** |         |       |        |        |
| Ni | -0.188  | -0.082  | -0.008  | 0.860** | 0.288*  | 0.239   |       |        |        |
| Zn | 0.595** | 0.589** | 0.725** | 0.089   | 0.363** | 0.405** | 0.206 |        |        |
| Cu | 0.202   | 0.201   | 0.314*  | 0.137   | 0.169   | 0.223   | 0.145 | 0.362* |        |
| Fe | -0.226  | -0.265  | -0.015  | 0.265   | 0.448** | 0.129   | 0.264 | 0.010  | -0.044 |

\*\* : The correlation is significant at the 0.01 level (two-tailed);

\* : The correlation is significant at the 0.05 level (two-tailed).
